# Supplementary material for: Gut symbiotic microbes imprint intestinal immune cells with the innate receptor SLAMF4 which contributes to gut immune protection against enteric pathogens
Source: PubMed Central journal article supplement — Gut. 2017 Mar 24;67(5):847–59. doi: 10.1136/gutjnl-2016-313214 (PMC5890651; doi:10.1136/gutjnl-2016-313214), 2017-03-24
Supplement: gutjnl-2016-313214supp001.pdf [file gutjnl-2016-313214supp001.pdf]

**a. Mouse strain: C57BL/6**

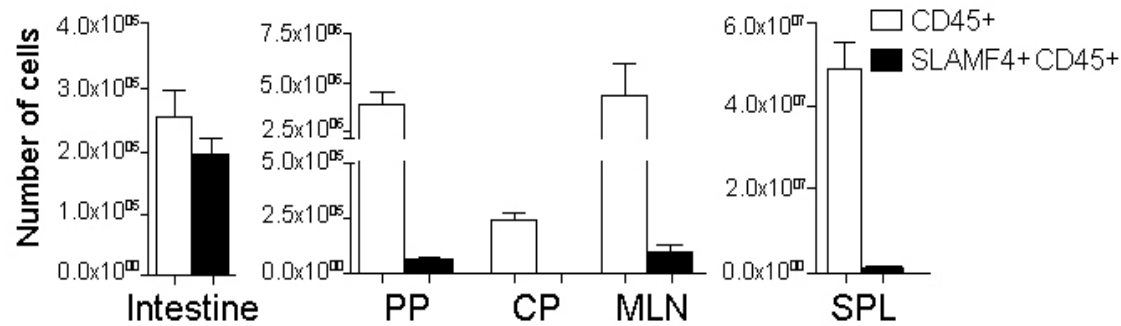

**b. Mouse strain: BALB/c**

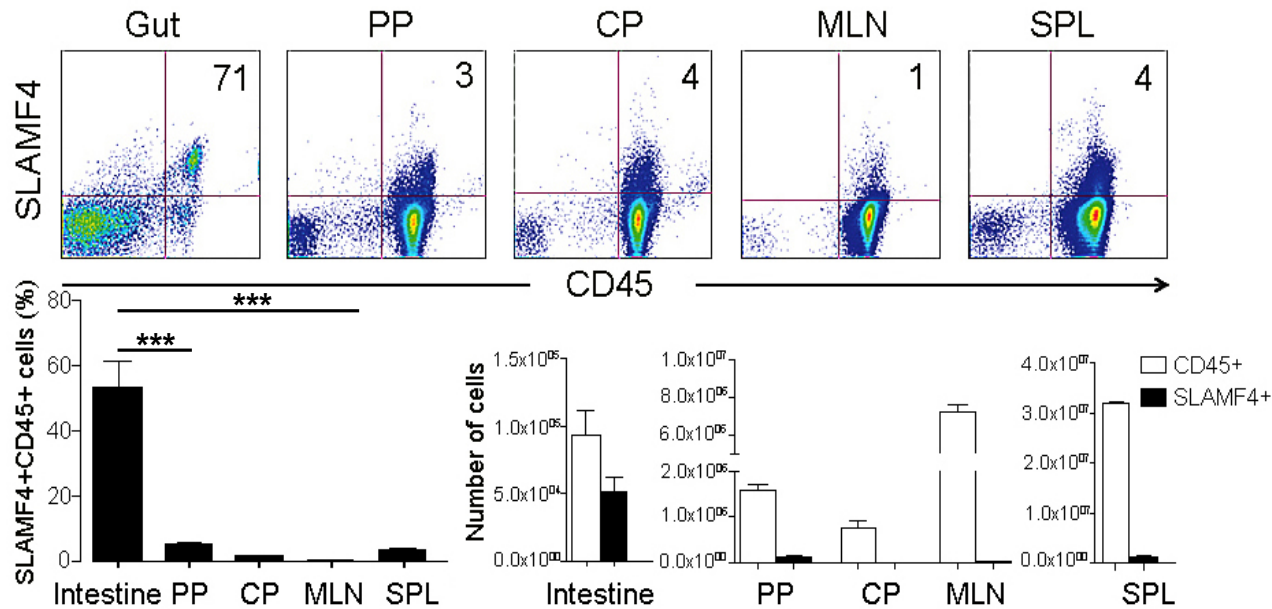

**Supplemental Figure 1. SLAMF4 is a marker of CD45+ immune cells of the intestinal mucosa. (a)** Most hematopoietic derived-cells in the gut mucosa, but not the Peyer's patch (PP), cecal patch (CP), mesenteric lymph nodes (MLN), or spleen (SPL) of C57BL-6 mice express SLAMF4 ( $n=8-20$ ). Data are shown as means of total numbers of SLAMF4+CD45+ cells  $\pm$  s.e.m. Error bars represent s.e.m. **(b)** CD45+ cells in the gut mucosa, but not in other tissues of BALB/c mice express SLAMF4. Numbers indicate the % CD45+ cells that are SLAMF4+. Below, data are shown as means of % of CD45+ and total numbers of SLAMF4+CD45+ cells  $\pm$  s.e.m. Error bars represent s.e.m. Data are from 3 experiments using 2 mice per experiment.

# Intra-Epithelial Lymphocyte Compartment

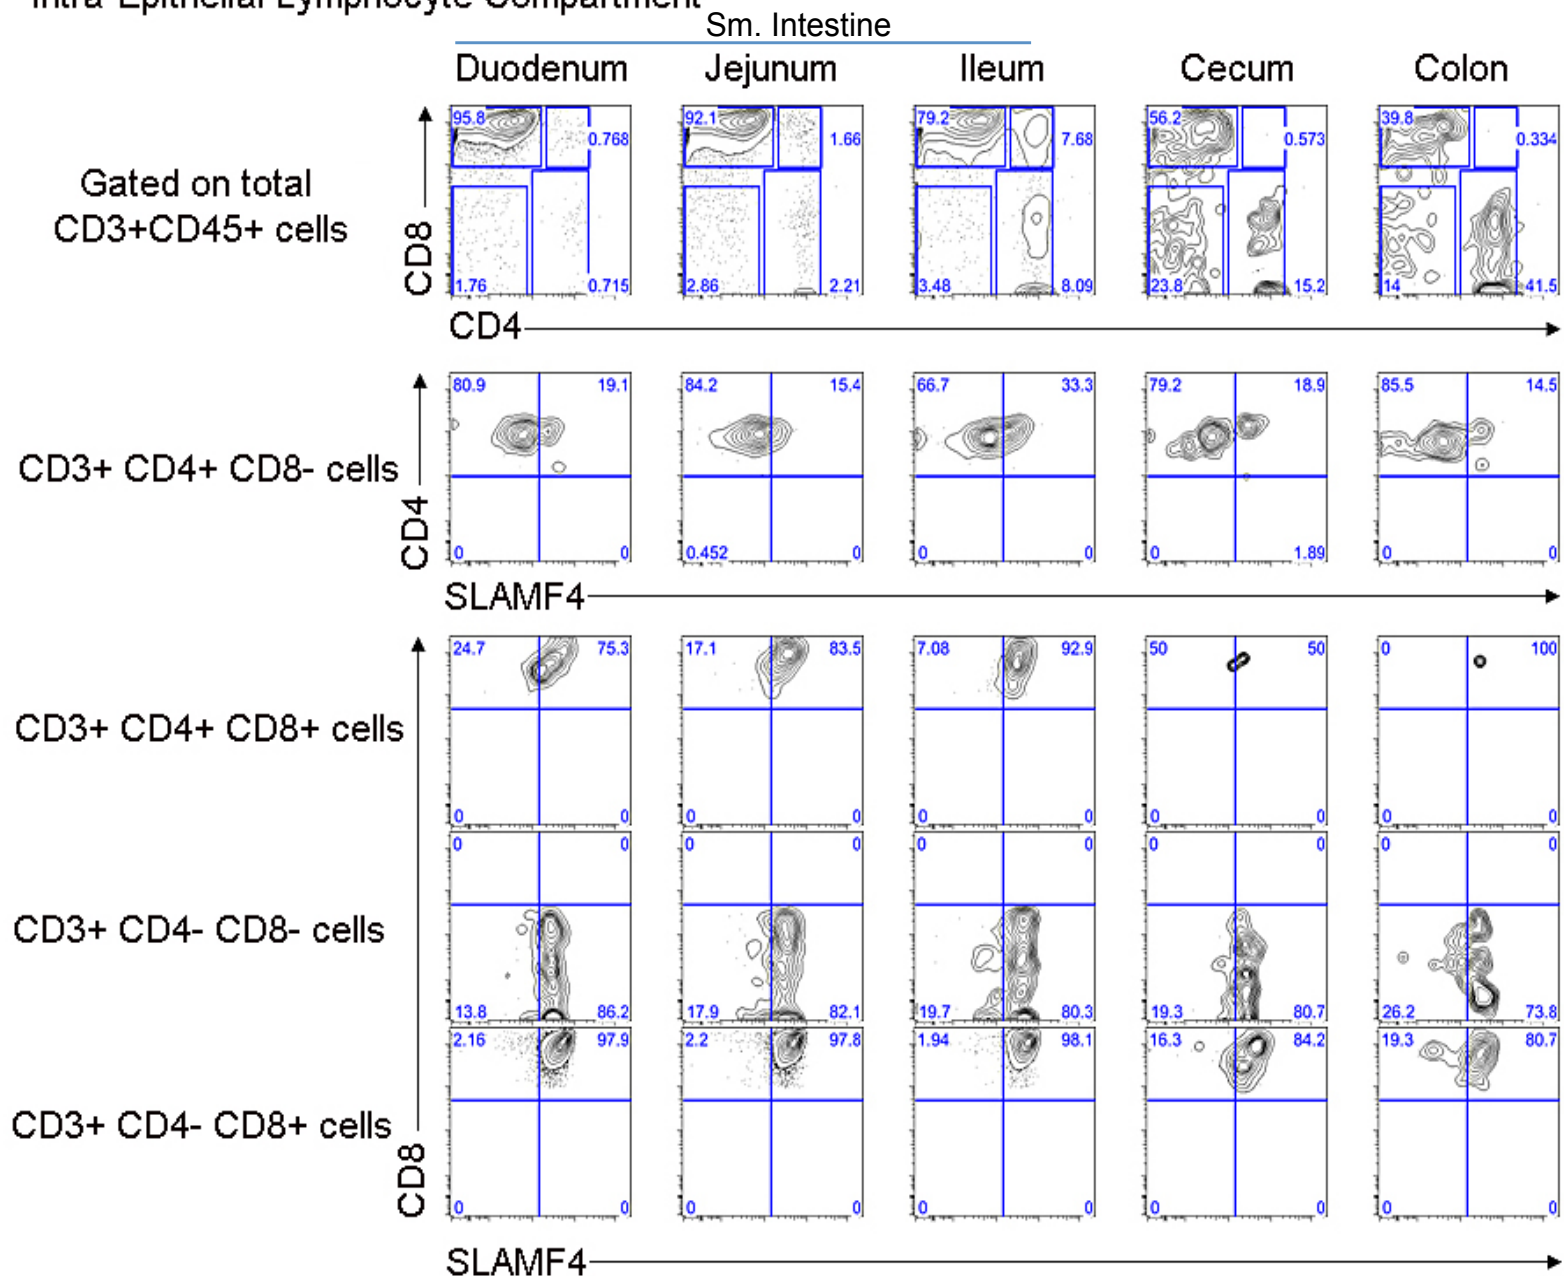

**Supplemental Figure 2. SLAMF4 expression on T lymphocytes in the IEL compartment.** SLAMF4 is expressed by different T lymphocyte subsets in the IEL compartment of the duodenum, jejunum, and ileum (which constitute the small intestine) as well as cecum, and colon. Dot plots are representative of  $n=4$ . Numbers indicate the % CD3+CD45+ T cell subsets (*upper panel*) and % SLAMF4-expressing CD3+CD45+ T cell subsets (*lower panels*).

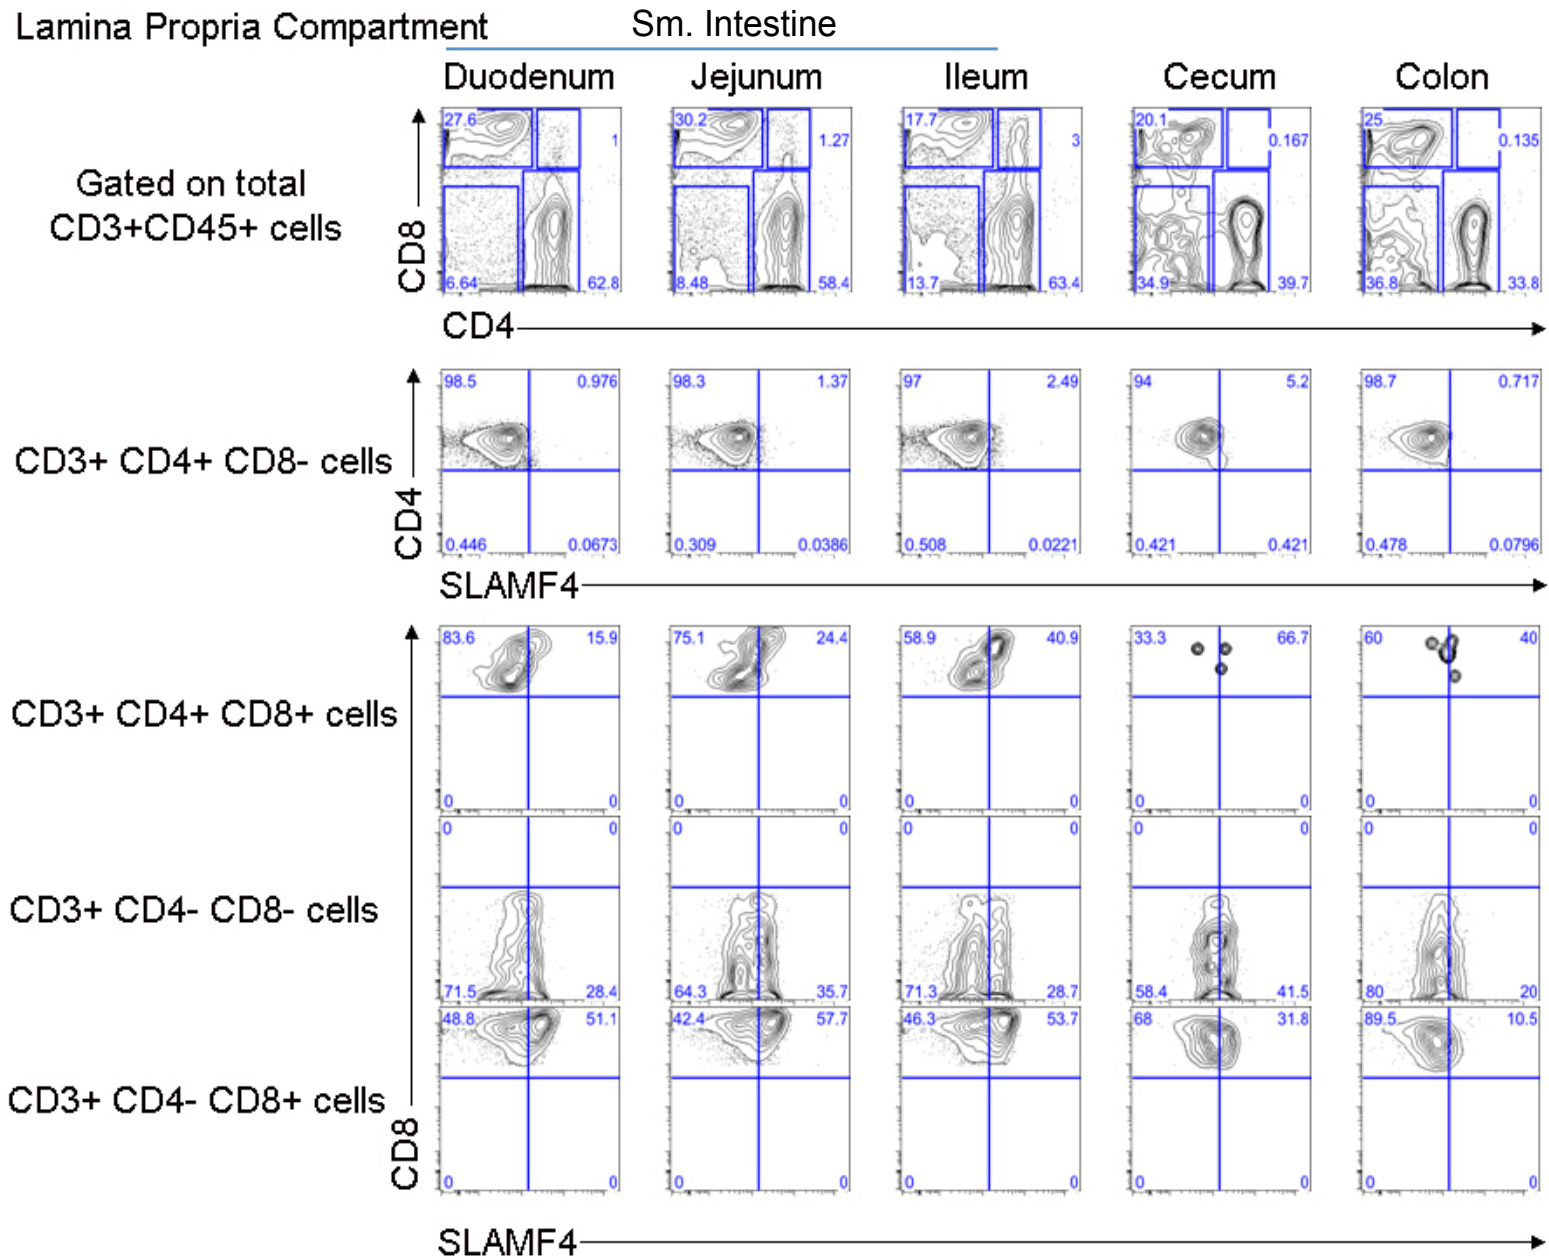

**Supplemental Figure 3. SLAMF4 expression on T lymphocytes in the lamina propria.** SLAMF4 is expressed by different T lymphocyte subsets in the lamina propria of the duodenum, jejunum, and ileum (which constitute the small intestine) as well as cecum, and colon. Dot plots are representative of  $n=4$ . Numbers indicate the % CD3+CD45+ cell subsets (*upper panel*) and % SLAMF4-expressing CD3+CD45+ T cell subsets (*lower panels*).

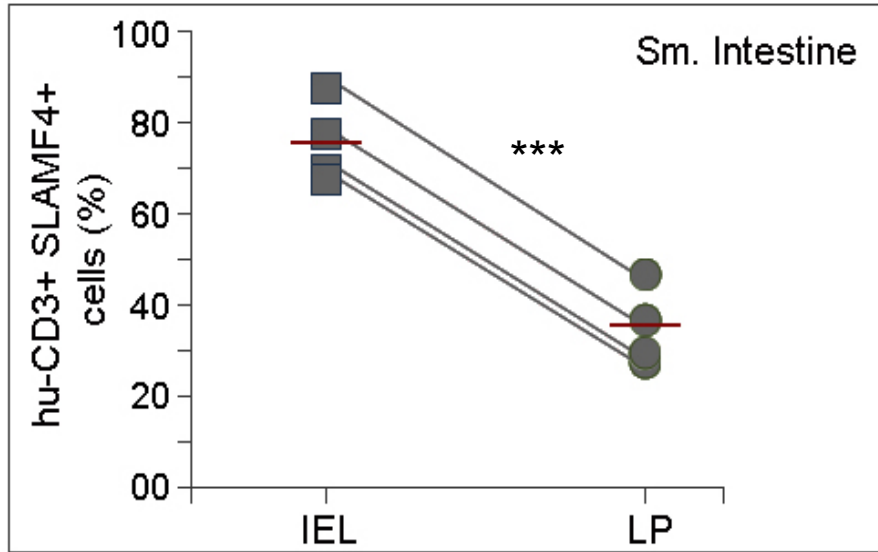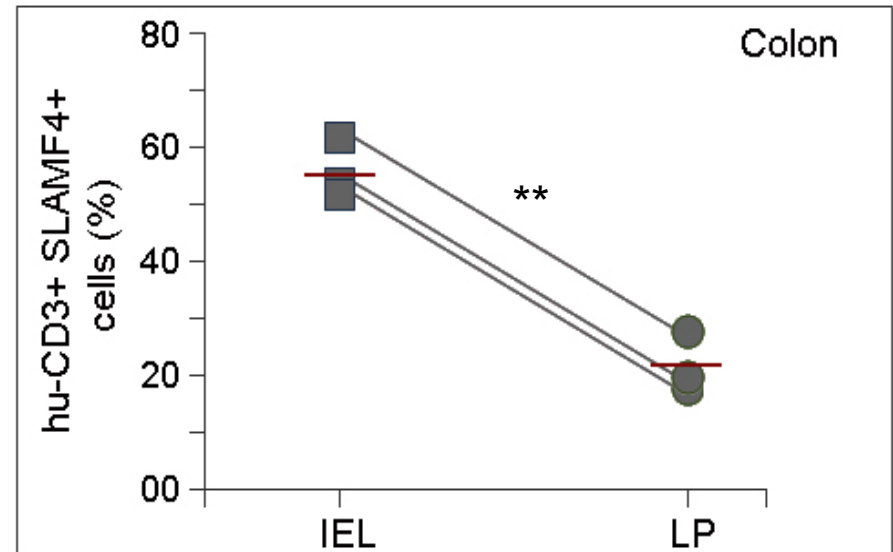

**Supplemental Figure 4. SLAMF4 expression by total CD3+ cells in human intestinal mucosa.** Human small intestine and colon samples were obtained, IEL and LP fractions prepared, and stained for flow cytometry with anti-human SLAMF4, anti-CD45, and anti-CD3 antibodies. Data indicate SLAMF4 expression as % of CD45+ CD3+ cells and relationship between IEL and LP for each tissue sample. ( $n=4$  small intestine,  $n=3$  colon,  $**P < 0.005$ ,  $***P < 0.0005$  using student's two-tailed t test).

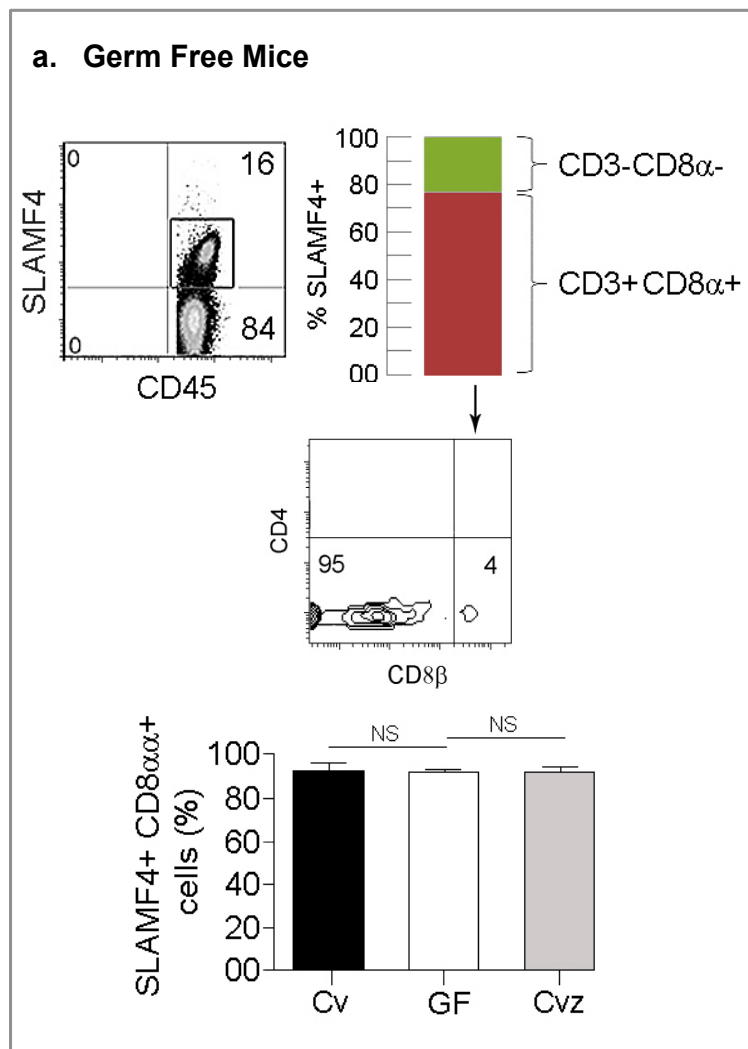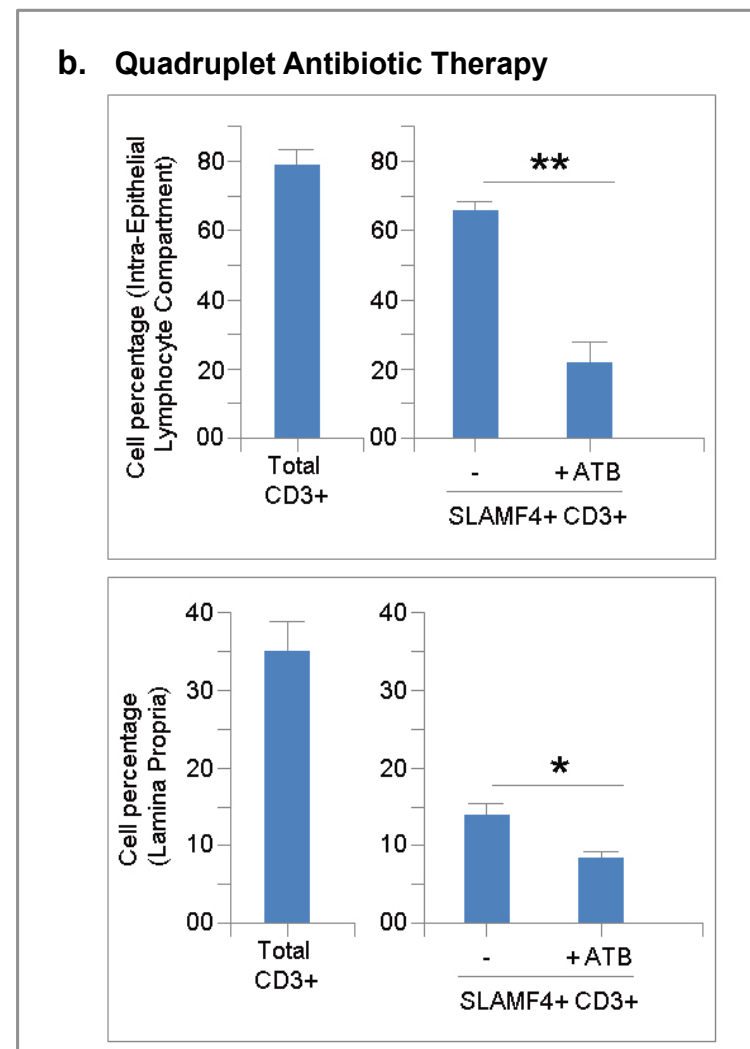

**Supplemental Figure 5. (a)** Natural CD8 T cells (CD3+CD8α+CD8β-CD4-) express SLAMF4 in germ-free (GF) BALB/c mice. In GF mice, SLAMF4 expression on natural CD8α T cells is similar to their counterparts in conventional (Cv) and conventionalized (CvZ) mice. Data are shown as means of % natural CD8α T cells that are SLAMF4+ ± SD. Error bars represent SD. Data were generated from 3 experiments using 2 to 3 mice per experiment. **(b)** Mice were left untreated (-) or treated with a combination of 4 antibiotics (ATB; ampicillin, metronidazole, neomycin, and vancomycin). Bar graphs show % intestinal CD3+ CD45+ cells that remain SLAMF4+ after ATB treatment. Data are from  $n=4$ . A 2-tailed Student's  $t$  test distribution with paired groups was evaluated for statistical significance.  $P > .05$  was considered not significant (NS),  $*P < .05$  was considered significant, and  $**P < .005$ .

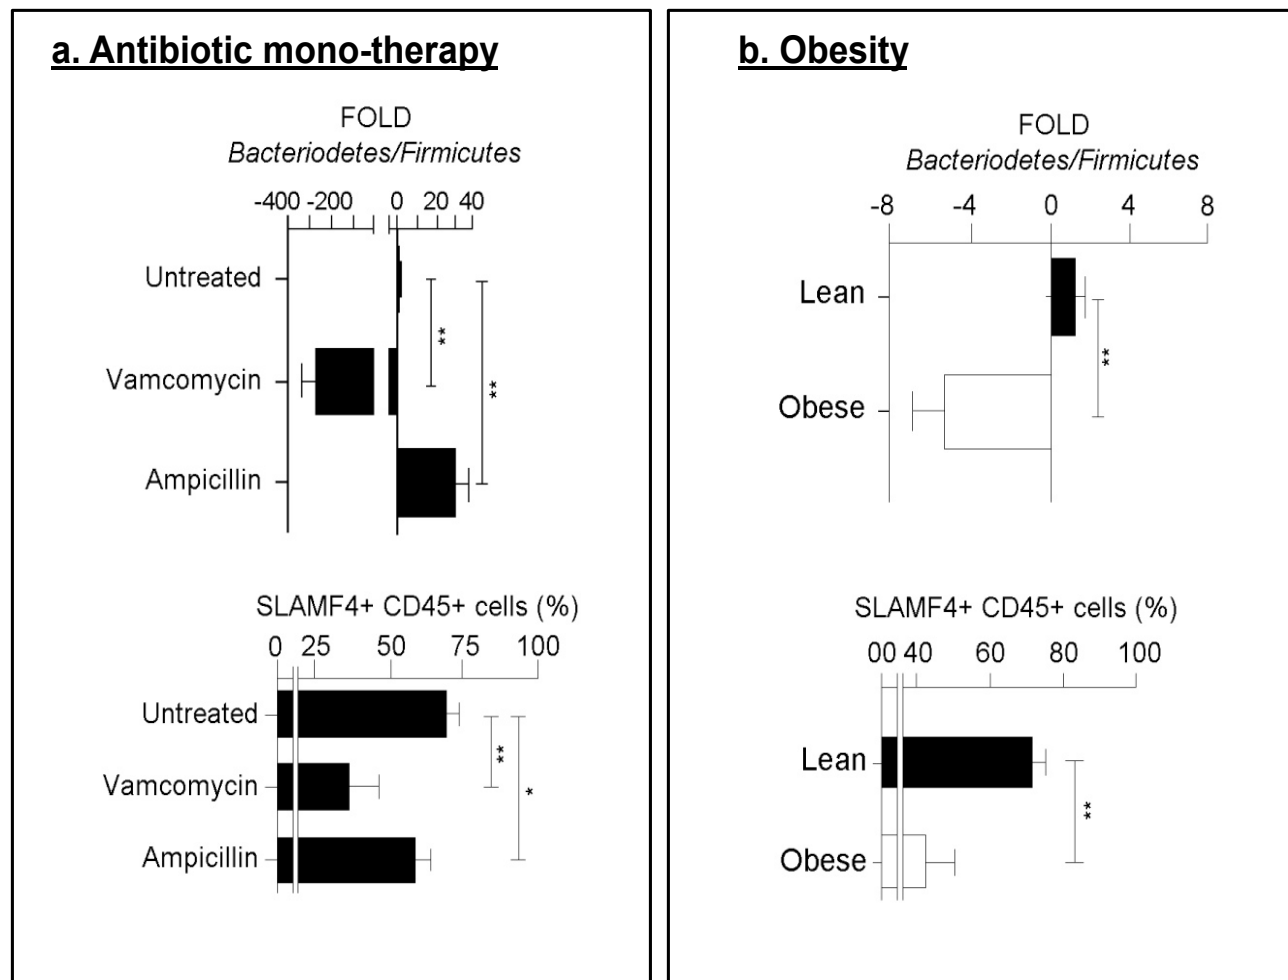

**Supplemental Figure 6. Subtle changes of the gut microbiota affect SLAMF4 expression in the intestine. (a)** B6 mice were left untreated or treated with ampicillin (1 mg/mL) or vancomycin (0.5 mg/mL) in the drinking water. Four weeks later, fecal DNA was made from intestinal contents and analyzed for the proportions of *Bacteroidetes* and *Firmicutes* by qPCR. *Below*, gut mucosal cell preparations were made, stained for SLAMF4 and CD45, and analyzed by flow cytometry. Data are shown as means of % CD45+ intestinal cells that remain SLAMF4+. **(b)** Bar graph shows shifts in bacterial populations (fold *Bacteroidetes/Firmicutes*) in the gut of obese (DIO) mice compared to lean (control) animals. *Below*, pooled IELs and LPs were analyzed by flow cytometry. Data are shown as means of % gut CD45+ cells that are SLAMF4+. Data are from n=5 (a) and n=9 (b) per animal group. Data are shown as means  $\pm$  s.e.m. Error bars represent s.e.m. A 2-tailed Student's *t* test distribution with paired groups was evaluated for statistical significance. \**P* < 0.05 was considered significant, \*\**P* < 0.005.

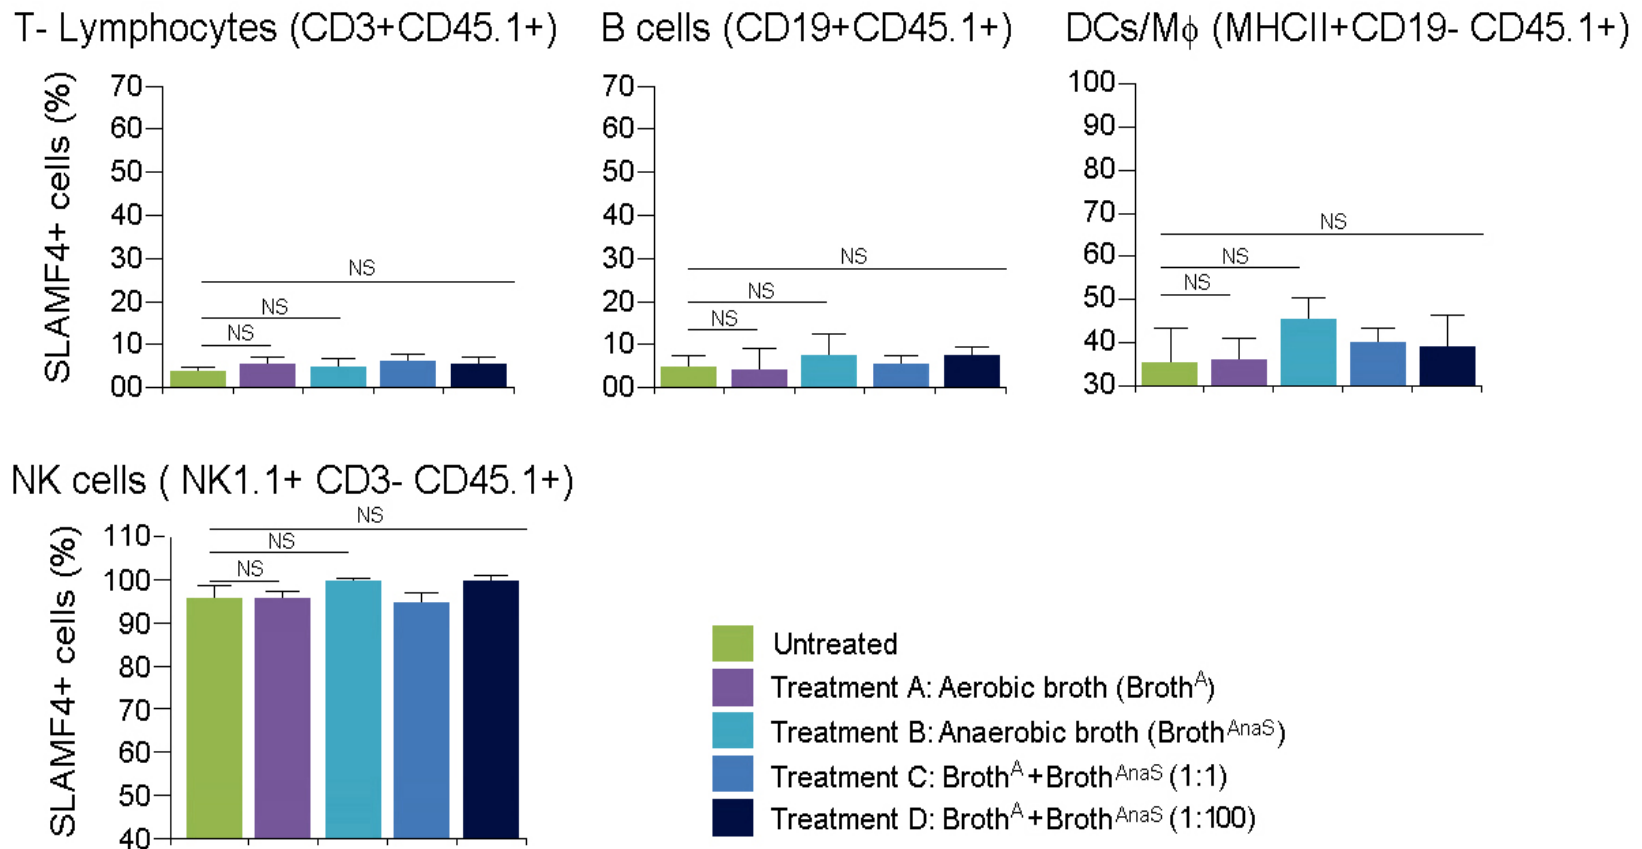

**Supplemental Figure 7. Stimulation of splenocytes with control bacterial broths.** BHI broth (Aerobic, Broth<sup>A</sup>) and OxyRase™ AnaSelect supplemented-BHI broth (anaerobic, Broth<sup>AnaS</sup>) were used to stimulate CD45.1 B6 splenocytes. Eighteen hours later, immune cell types such as T lymphocytes (CD3+), NK cells (Nkp46+), B cells (CD19+), and other APCs (CD19-MHCII+) were examined for the expression of SLAMF4 by flow cytometry. For this, propidium iodide (PI) plot of total CD45+ cells was used to select PI<sup>-</sup> events which represent viable CD45 cells. Overall cell viability was >75%. Data are shown as means of % of each cell type expressing SLAMF4 ± SD. Error bars represent SD. Data were generated from *n*=6. A 2-tailed Student's *t* test distribution with paired groups was evaluated for statistical significance. *P* > 0.05 was considered not significant (NS).

**a**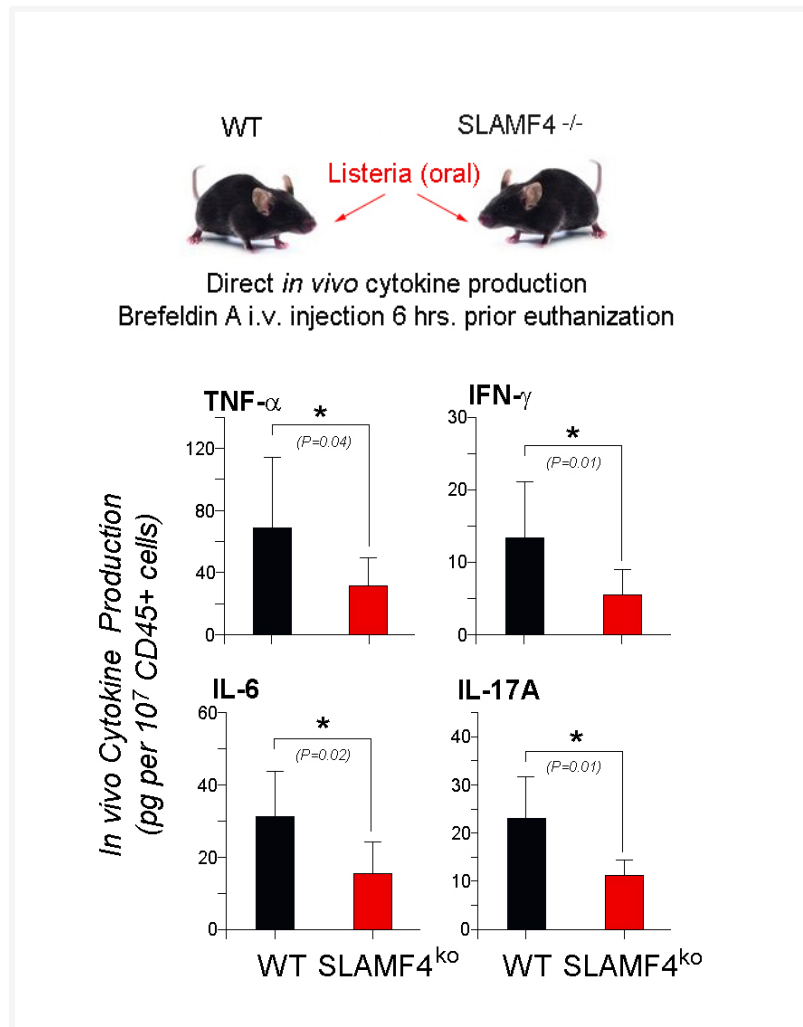**b**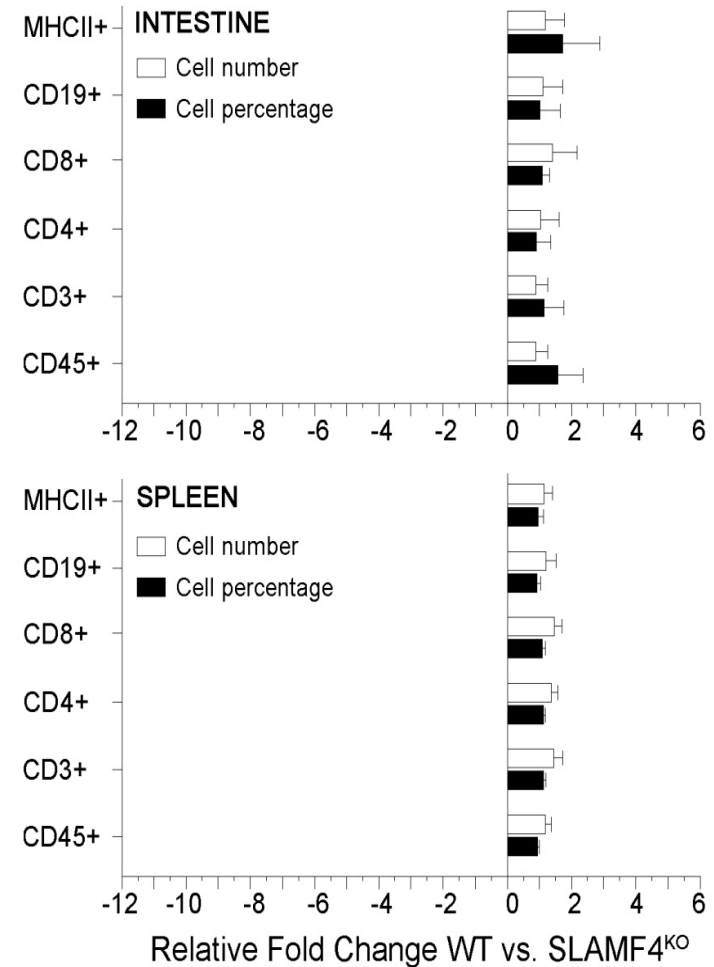

**Supplemental Figure 8. Characterization of SLAMF4<sup>ko</sup> mice.** (a) Direct *in vivo* cytokine production in the gut mucosa following Lm infection was assessed as described in [53]. Briefly, Brefeldin-A (250  $\mu$ g) was injected *i.v.* into mice 4.5 days post Lm-infection, and 6 hours later, mice were euthanized. Single CD45+ cell suspensions isolated from pooled IEL and LP cells were homogenized. The supernatants were used to assess cytokine production using BD multiplex bead-based immunoassays (BD Bioscience). Data are shown as means of pgs of produced cytokine per 10<sup>7</sup> gut CD45+ cells  $\pm$  SD. Error bars represent SD. Data are from 2 experiment using 4 mice per group per experiment. (b) Immune cell composition was assessed by flow cytometry using age- and sex-matched groups of cohoused SLAMF4<sup>ko</sup> mice and WT littermates. Splenocytes and gut mucosal cell preparations (IEL+LP) were made from each strain, stained for CD45, CD3, CD4, CD8, CD19, and MHC-II and analyzed by flow cytometry. Data are shown as means of % and total number of each cell type  $\pm$  SD. Error bars represent SD. Data are from 3 experiments using 2 to 4 mice per group per experiment. A 2-tailed Student's *t* test distribution with paired groups (WT vs. SLAMF4<sup>ko</sup>) was evaluated for statistical significance. \* $P < 0.05$  was considered significant.
