# Supplementary material for: Gut symbiotic microbes imprint intestinal immune cells with the innate receptor SLAMF4 which contributes to gut immune protection against enteric pathogens
Source: PubMed Central journal article supplement — Gut. 2017 Mar 24;67(5):847–59. doi: 10.1136/gutjnl-2016-313214 (PMC5890651; doi:10.1136/gutjnl-2016-313214), 2017-03-24
Supplement: gutjnl-2016-313214supp003.pdf [file gutjnl-2016-313214supp003.pdf]

**Supplementary Table 1.** Sequences of oligonucleotide primers for analysis of cytokines and transcriptional factors. Primer sequence sets used in this study were obtained from Invitrogen

|                |                                                                                      |
|----------------|--------------------------------------------------------------------------------------|
| TGF- $\beta$ 1 | Forward: 5'- CTCCCGTGGCTTCTAGTGC-3'<br>Reverse: 5'- GCC TTA GTT TGG ACA GGA TCT G-3' |
| IL-6           | Forward: 5'-TAGTCCTTCCTACCCCAATTTCC-3'<br>Reverse: 5'-TTGGTCCTTAGCCACTCCTTC-3'       |
| IL-12          | Forward: 5'-CAATCACGCTACCTCCTCTTTT-3'<br>Reverse: 5'-CAGCAGTGCAGGAATAATGTTTC-3'      |
| IL-17          | Forward: 5'-TTTAACTCCCTTGGCGCAAAA-3'<br>Reverse: 5'-CTTTCCTCCGCATTGACAC-3'           |
| IL-22          | Forward: 5'-TCCGAGGAGTCAGTGCTAAA-3'<br>Reverse: 5'-AGAACGTCTTCCAGGGTGAA-3'           |
| IL-23          | Forward: 5'-TTTTGTGCGGAATGGTCTTC-3'<br>Reverse: 5'-GCCACTTTGGGATCATCAGT-3'           |
| TNF- $\alpha$  | Forward: 5'-CATCTCTTTATCGACGAGACCAG-3'<br>Reverse: 5'-GTATTCTTTGGACACGCGGTA-3'       |
| IFN- $\gamma$  | Forward: 5'-ATGAACGCTACACACTGCATC-3'<br>Reverse: 5'-CCATCCTTTTGCCAGTTCCTC-3'         |
| T-bet          | Forward: 5'-CAACAACCCCTTTGCCAAAG-3'<br>Reverse: 5'-TCCCCCAAGCAGTTGACAGT-3'           |
| ROR $\gamma$ t | Forward: 5'-GACCCACACCTCACAAATTGA-3'<br>Reverse: 5'-AGTAGGCCACATTACACTGCT-3'         |
| Eomes          | Forward: 5'-CCTTCACCTTCTCAGAGACACAGTT-3'<br>Reverse: 5'-TCGATCTTTAGCTGGGTGATATCC-3'  |
| HPRT           | Forward: 5'-CTGGTGAAAAGGACCTCTCG-3'<br>Reverse: 5'-TGAAGTACTCATTATAGTCAAGGGCA-3'     |
